# Supplementary material for: Low‐dose fenfluramine significantly reduces seizure frequency in Dravet syndrome: a prospective study of a new cohort of patients
Source: PubMed Central journal article supplement — Eur J Neurol. 2016 Oct 28;24(2):309–14. doi: 10.1111/ene.13195 (PMC5298030; doi:10.1111/ene.13195), 2016-10-28
Supplement: ENE-24-309-s001.pdf [file ENE-24-309-s001.pdf]

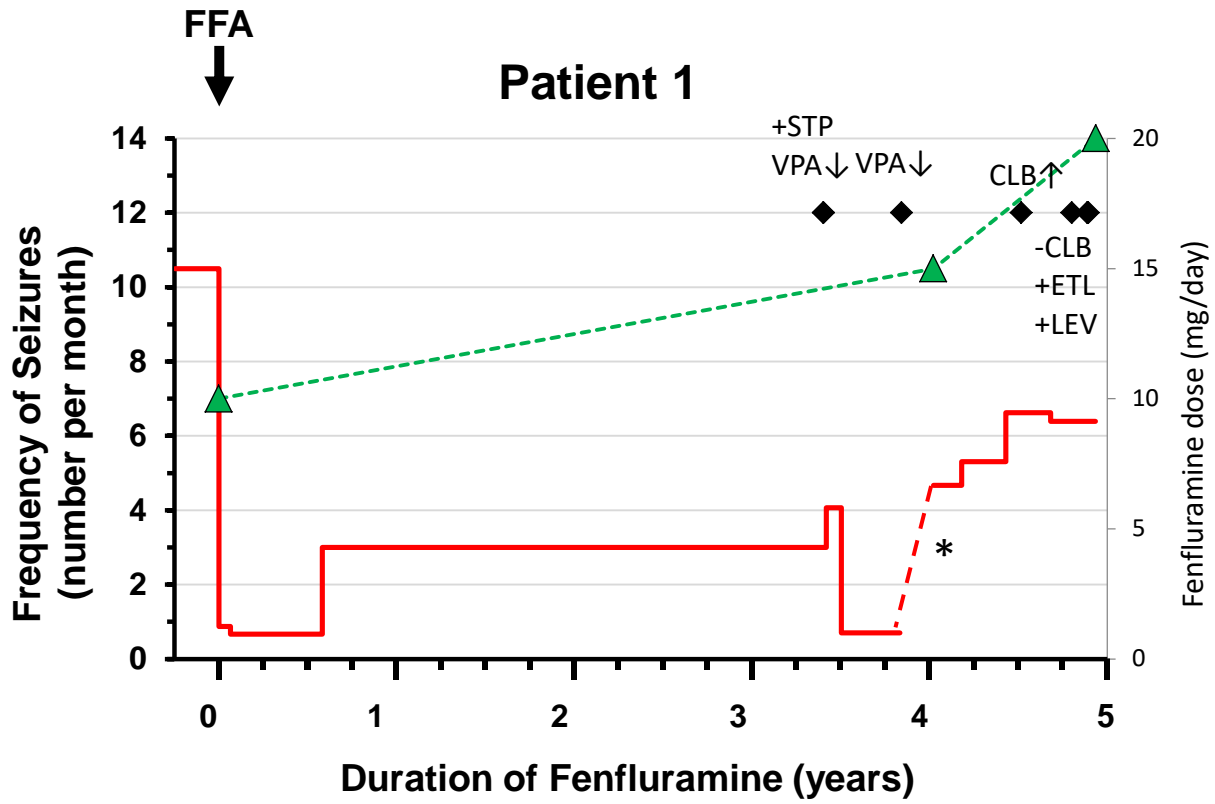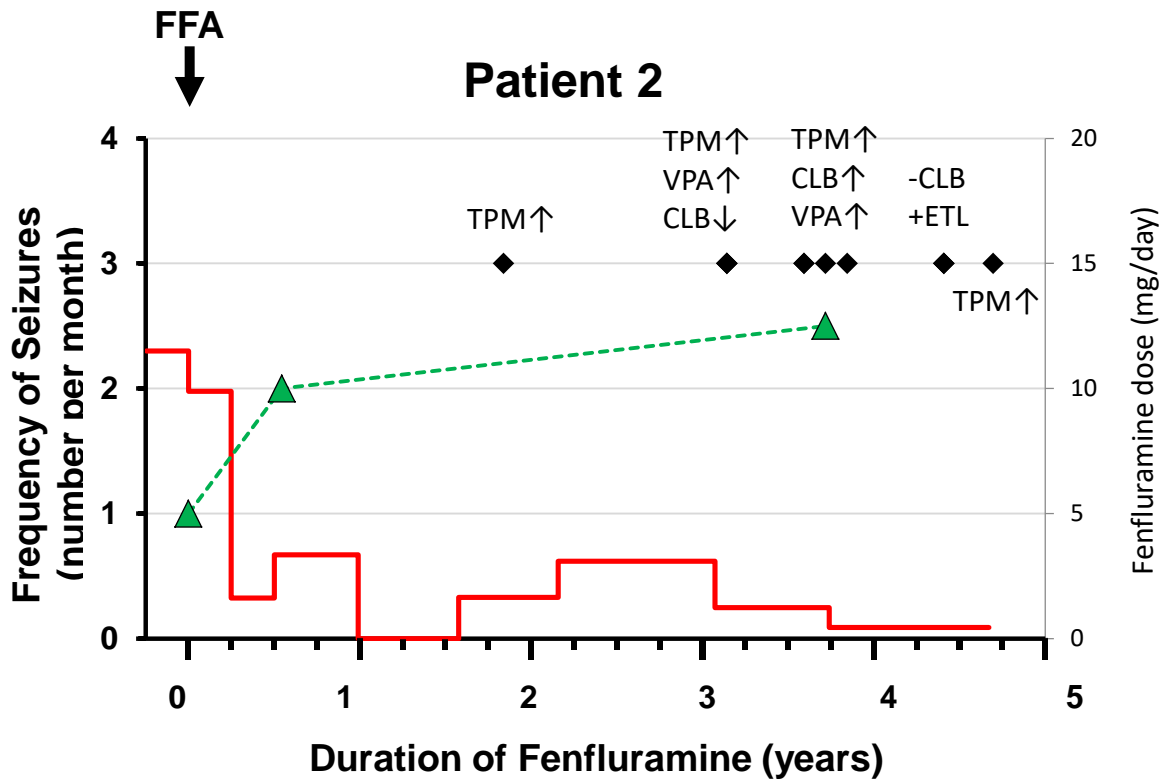

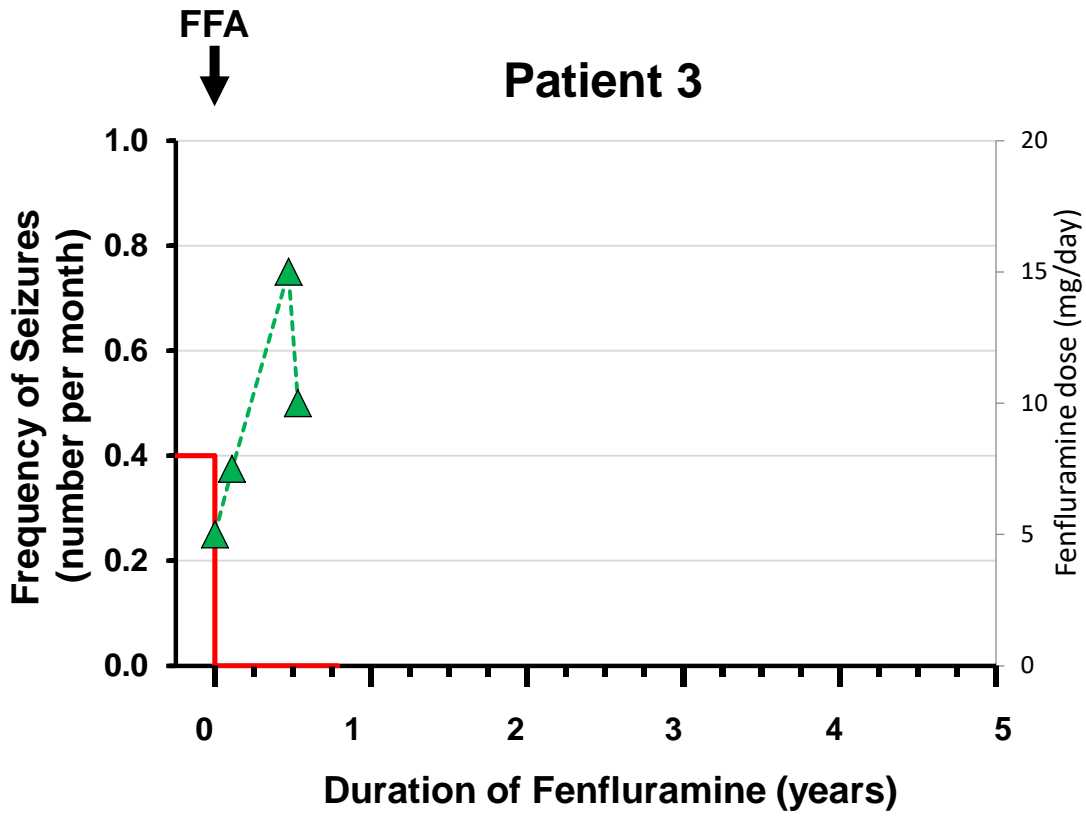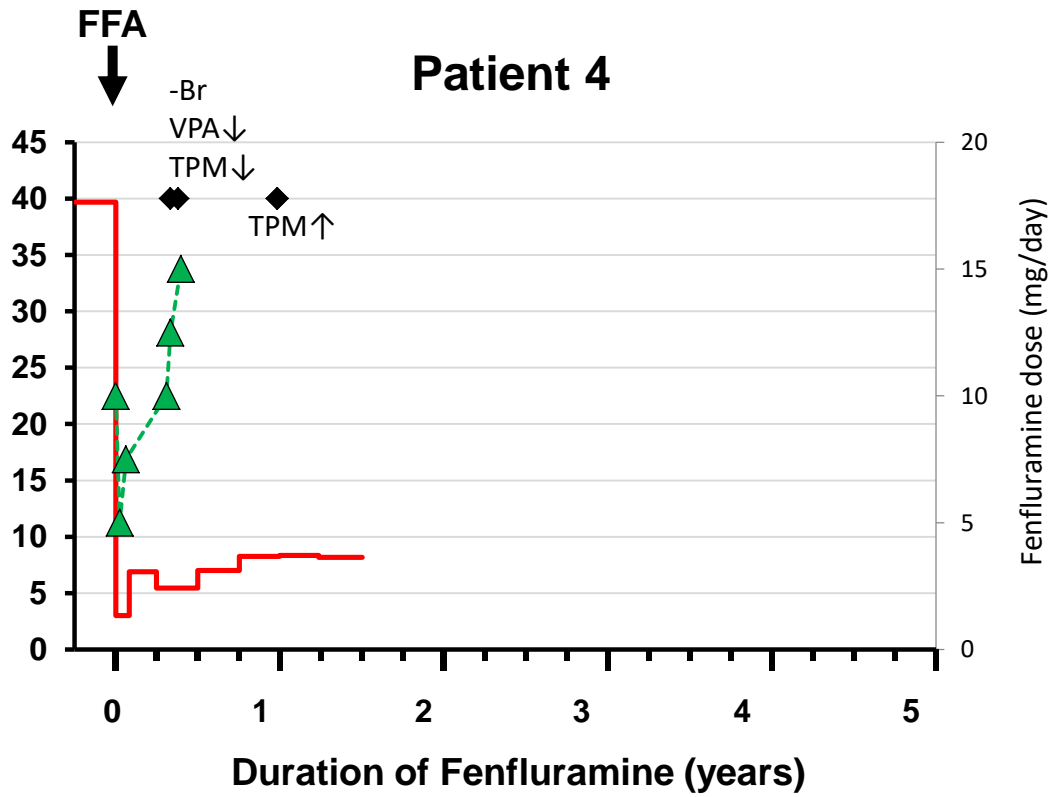

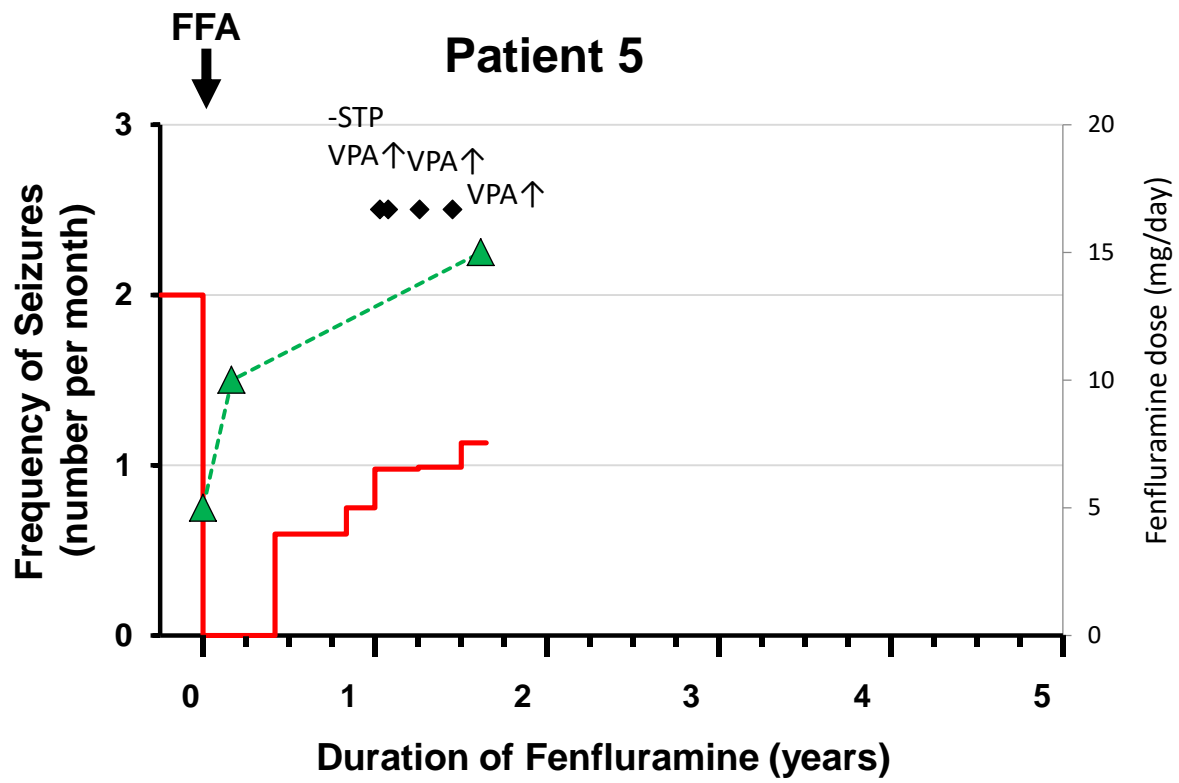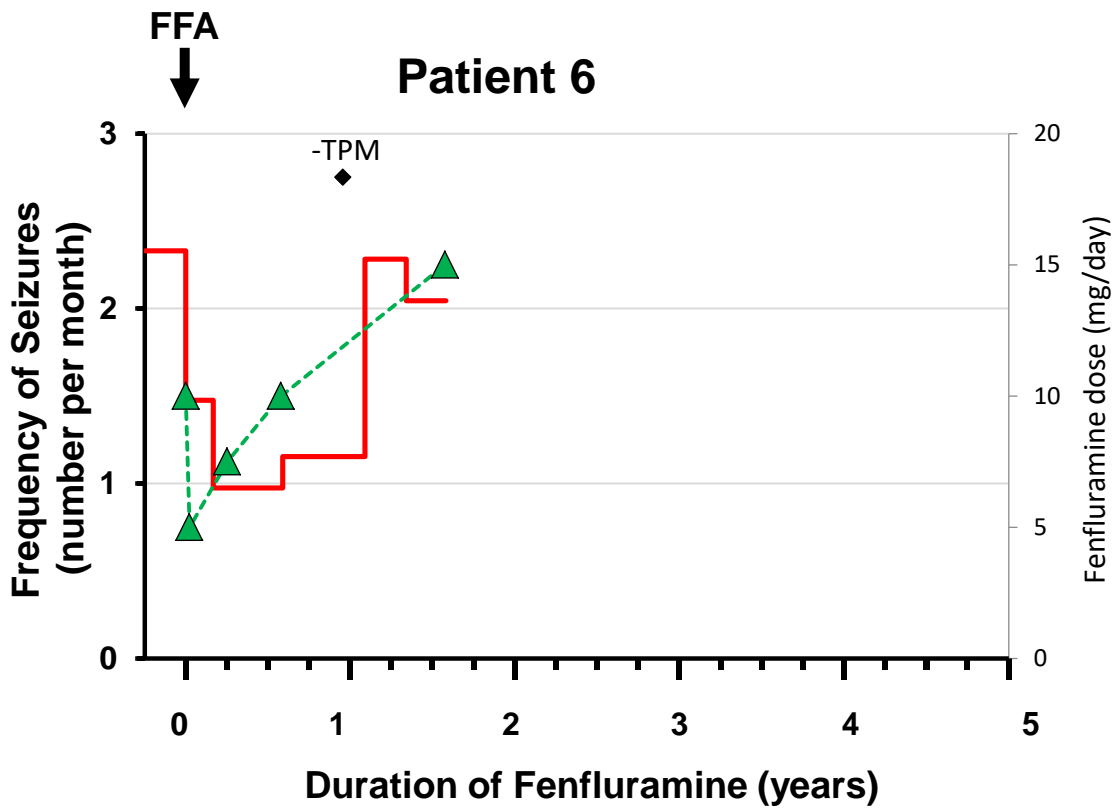

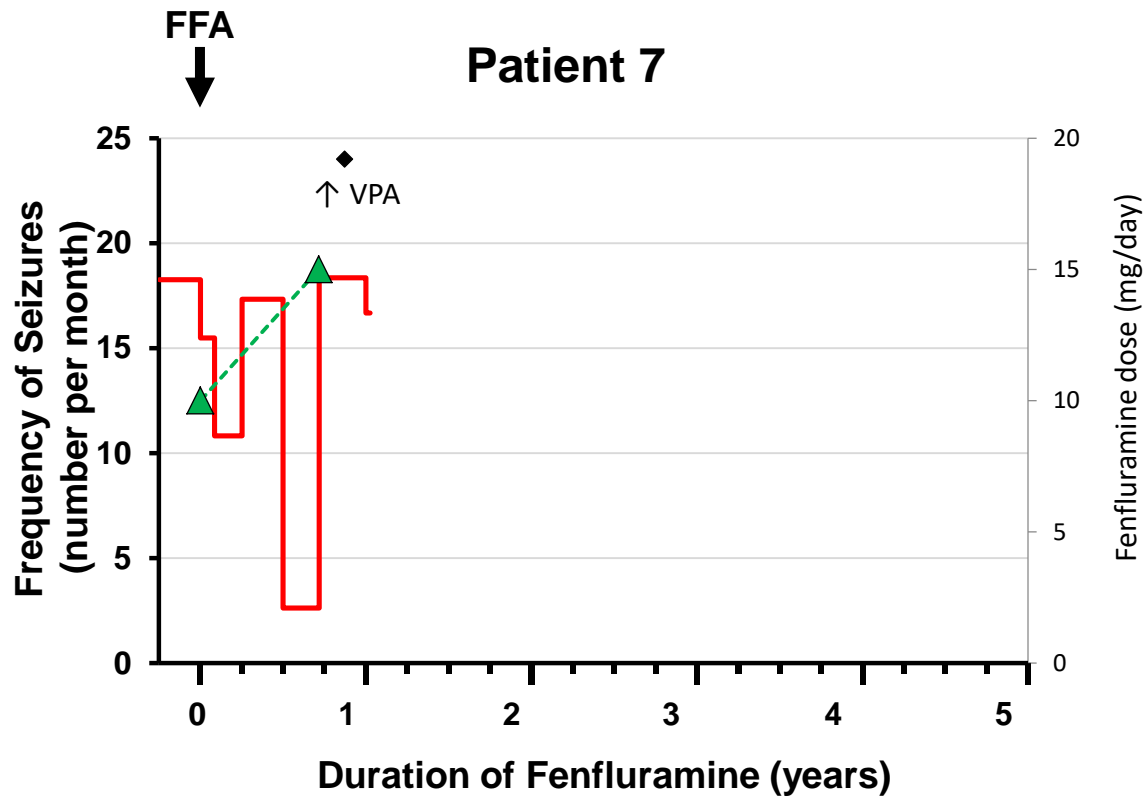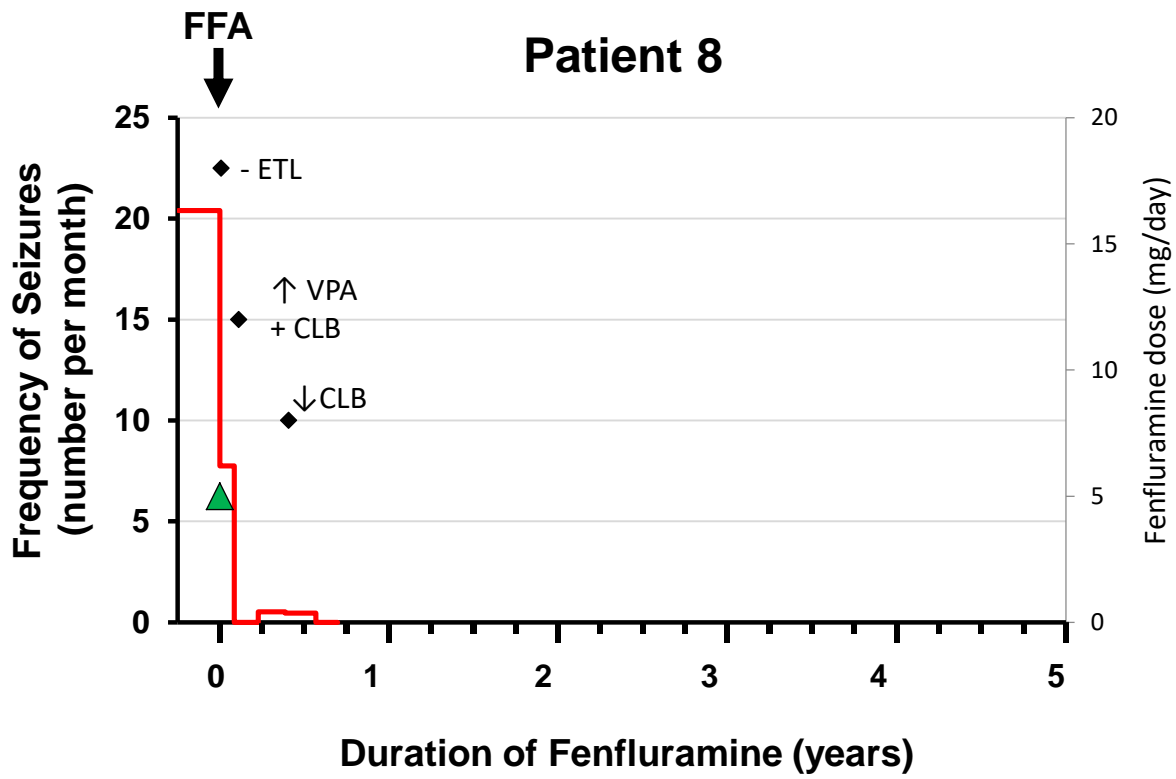

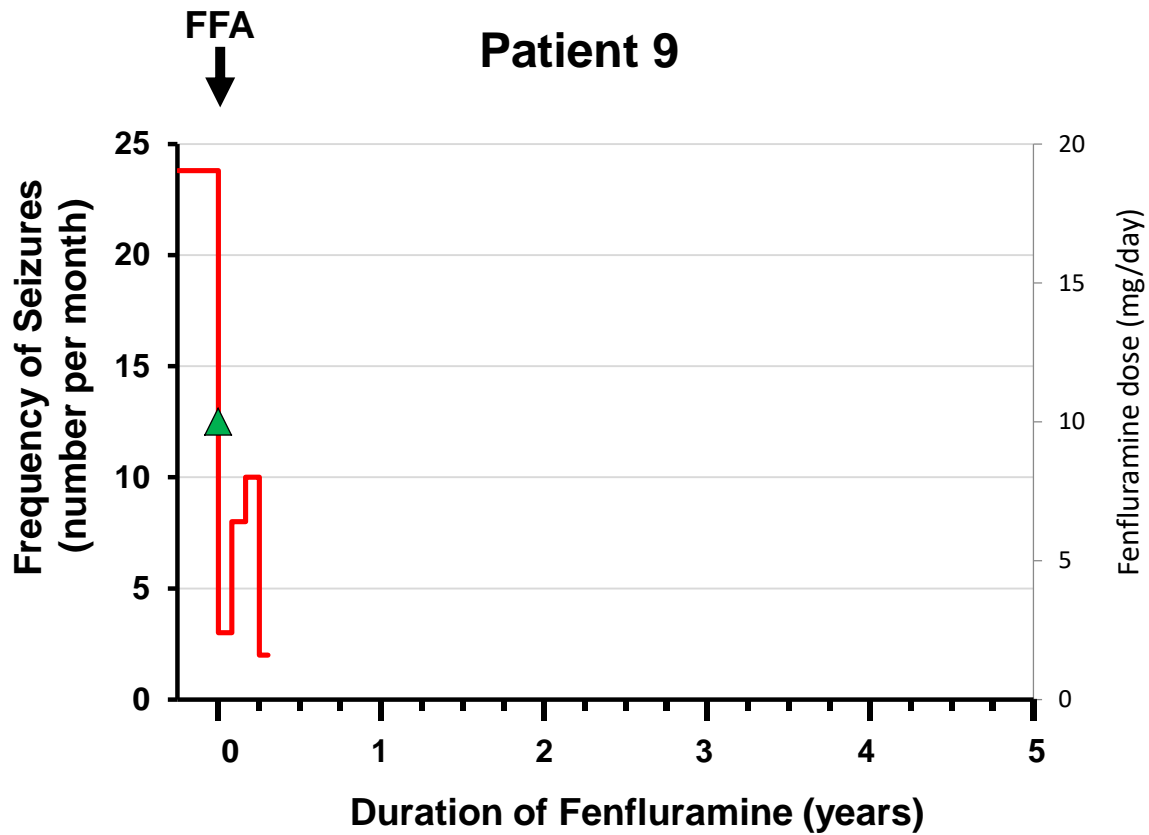

**Legend figures supplementary material:**

The seizure frequency is indicated by a red line ( — , left Y-axis). The daily dose of fenfluramine (mg/day) is indicated by a green triangle (▲, right Y-axis). Changes in AED regimens are noted as follows: “+”, new drug added; “-”, drug stopped; “↑” dose increased; “↓”, dose decreased. BR, bromide; CLB, clobazam; ETL, ethyl loflazepate; FFA, fenfluramine; LEV, levetiracetam; STP, stiripentol; TPM, topiramate; VPA, valproic acid. \* The dotted line (patient 1) represents missing data.
